# Supplementary material for: An Integrated Analysis of RNA Sequencing and Molecular Docking Reveal EIF2AK2, IFIT1, and STAT1 as Key Targets of EGCG in Nasopharyngeal Carcinoma
Source: Research Square preprint supplement (doi:10.21203/rs.3.rs-6726357/v1), 2025-06-13
Supplement: Supplementary file 1 [file 361c53f081672052ab828d98.xlsx]

## Sheet: STAT1
Heterogeneity
id.exposure	id.outcome	outcome	exposure	method	Q	Q_df	Q_pval
eqtl-a-ENSG00000115415	tXJd8P	Nasopharyngeal carcinoma	exposure	MR Egger	5.89400927922465	8	0.659103196297133
eqtl-a-ENSG00000115415	tXJd8P	Nasopharyngeal carcinoma	exposure	Inverse variance weighted	6.89730685842274	9	0.647810441776091
MRresult
id.exposure	id.outcome	outcome	exposure	method	nsnp	b	se	pval	lo_ci	up_ci	or	or_lci95	or_uci95
eqtl-a-ENSG00000115415	tXJd8P	Nasopharyngeal carcinoma	exposure	MR Egger	10	-0.210854	0.967527274875956	0.832939211259302	-2.10721	1.68549960027617	0.809892417141433	0.121577018824918	5.39514567541571
eqtl-a-ENSG00000115415	tXJd8P	Nasopharyngeal carcinoma	exposure	Weighted median	10	0.383562901956664	0.44791994227192	0.391820681840644	-0.49436	1.26148598880963	1.46750385840971	0.609961044764187	3.53066411852573
eqtl-a-ENSG00000115415	tXJd8P	Nasopharyngeal carcinoma	exposure	Inverse variance weighted	10	0.690347767067086	0.355828654830925	0.0523659693653515	-0.0070764	1.3877719305357	1.99440900242256	0.992948582336943	4.00591464623735
eqtl-a-ENSG00000115415	tXJd8P	Nasopharyngeal carcinoma	exposure	Simple mode	10	0.422730432277675	0.769923071345415	0.596324399311202	-1.08632	1.93177965211469	1.52612284705241	0.337456458933568	6.90178208962314
eqtl-a-ENSG00000115415	tXJd8P	Nasopharyngeal carcinoma	exposure	Weighted mode	10	0.304911868464526	0.439518384567777	0.505354087114836	-0.556544	1.16636790221737	1.35650544683006	0.573186482807839	3.21031127298324
Pleiotropy
id.exposure	id.outcome	outcome	exposure	egger_intercept	se	pval
eqtl-a-ENSG00000115415	tXJd8P	Nasopharyngeal carcinoma	exposure	0.118746389423549	0.118551084504306	0.345844188459545

## Sheet: IFIT1
Heterogeneity
id.exposure	id.outcome	outcome	exposure	method	Q	Q_df	Q_pval
eqtl-a-ENSG00000185745	r2Fc3b	Nasopharyngeal carcinoma	exposure	MR Egger	7.57071432900156	7	0.37196357354568
eqtl-a-ENSG00000185745	r2Fc3b	Nasopharyngeal carcinoma	exposure	Inverse variance weighted	11.4869319801322	8	0.175605152902762
MRresult
id.exposure	id.outcome	outcome	exposure	method	nsnp	b	se	pval	lo_ci	up_ci	or	or_lci95	or_uci95
eqtl-a-ENSG00000185745	r2Fc3b	Nasopharyngeal carcinoma	exposure	MR Egger	9	2.07910745098873	0.914168389220311	0.057112908021092	0.287337408116917	3.87087749386054	7.99732772088777	1.33287386007342	47.9844736933749
eqtl-a-ENSG00000185745	r2Fc3b	Nasopharyngeal carcinoma	exposure	Weighted median	9	0.809797332809535	0.383776191404641	0.0348517199522807	0.0575959976564376	1.56199866796263	2.24745245564254	1.05928695483909	4.76834206000485
eqtl-a-ENSG00000185745	r2Fc3b	Nasopharyngeal carcinoma	exposure	Inverse variance weighted	9	0.441279957272372	0.354936675371225	0.213770600317673	-0.254396	1.13695584099997	1.5546958898432	0.775384745930772	3.11726445816763
eqtl-a-ENSG00000185745	r2Fc3b	Nasopharyngeal carcinoma	exposure	Simple mode	9	0.707576876253937	0.444760201222209	0.150292413443075	-0.164153	1.57930687064947	2.02906861262749	0.848612074028065	4.85159186482879
eqtl-a-ENSG00000185745	r2Fc3b	Nasopharyngeal carcinoma	exposure	Weighted mode	9	0.729987407804571	0.394205418060844	0.101197552883234	-0.0426552	1.50263002720383	2.0750544780181	0.958241723751986	4.49349154812778
Pleiotropy
id.exposure	id.outcome	outcome	exposure	egger_intercept	se	pval
eqtl-a-ENSG00000185745	r2Fc3b	Nasopharyngeal carcinoma	exposure	-0.265783	0.139673246806792	0.0987850807369866
